# Supplementary material for: Stable Pom1 clusters form a glucose-modulated concentration gradient that regulates mitotic entry
Source: eLife. 2019 May 3;8:e46003. doi: 10.7554/eLife.46003 (PMC6524964; doi:10.7554/eLife.46003)
Supplement: Supplementary file 2. — For each comparison, the table includes: Whether the slopes of the linear regressions (b1) are significantly different from each other at the 95% confidence level; whether the Y-intercepts of the linear regressions (b0) are significantly different from each other at the 95% confidence level. If the slopes of the linear regressions differed significantly, the difference in Y-intercepts was not tested. [file elife-46003-supp2.xlsx]

## Sheet: Line Comparisons
		2% vs 0.03% Glucose WT	2% vs 0.03% Glucose pom1∆	WT vs. cdr2(E177A)
# Bursts	Are slopes (b1) different?	**** p<0.0001	n.s. p=0.905	-
	Are Y-int (b0) different?	n/a	*** p<0.0001	-
Frequency	Are slopes (b1) different?	n.s. p=0.8426	n.s. p=0.3125	n.s. p=0.7651
	Are Y-int (b0) different?	n.s. p=0.4157	*** p=0.009	n.s. p=0.4379
Duration	Are slopes (b1) different?	n.s. p=0.0928	n.s. p=0.8352	n.s. p=0.8048
	Are Y-int (b0) different?	*** p=0.0005	n.s. p=0.5392	n.s. p=0.4143
